# Supplementary material for: Serengeti’s futures: Exploring land use and land cover change scenarios to craft pathways for meeting conservation and development goals
Source: Frontiers journal article supplement (doi:10.3389/fcosc.2022.920143), 2022-09-23
Supplement: Table_1.XLSX [file Table_1.XLSX]

## Sheet: DesirableUndesirable_N&ESerenge
	Northern and eastern Serengeti
	Desired 2030	Percent of mentions	Undesired 2030	Percent of mentions
	Human population growth is regulated	14.1667	Human population growth rate has continued unchecked	18.8679
	Good and stable governance	10.8333	Land degradation	11.3208
	Green infrastructure is being built and green energy is being used - human development needs and conservation goals are balanced	10	Bad governance	9.43396
	Comprehensive education on sustainable land use is provided to all (including climate change awareness)	9.16667	Encroachment into protected areas	9.43396
	Ecosystem health within and beyond protected areas is high (water and other resources are able to provision everyone including animals, people, and economic development)	8.33333	Impacts of climate change are disastrous	5.66038
	Sound land use management policies (LUP) have been devised and implemented in consultation with local people, and are flexible to changing demands	8.33333	Agricultural/livestock sector is underdeveloped	5.66038
	Policies and legal frameworks governing conservation are enforced and abided by	5.83333	Tourism industry is underdeveloped	5.66038
	Tourism sector is well regulated and beneficial to communities	5	Blockage of migratory corridors	3.77358
	Climate change adaptation strategies have been devised and implemented	4.16667	Land fragmentation	3.77358
	Protected areas are well demarcated, policed and intact and wildlife is thriving	4.16667	Deforestation	1.88679
	Education and investments are provided to farmers and livestock keepers to intensify production	3.33333	Education on sustainable land use has not been provided to all	1.88679
	Poverty alleviation strategies are put in place and social services have been improved in consultation with many diverse stakeholders	2.5	Investment in protected areas is unregulated	1.88679
	Reforestation and environental restoration is underway	2.5	The potential of this area is not realised because people failed to act	1.88679
	Communities are participating in sustainable ecosystem use and conservation	1.66667	Wildlife losses are high	1.88679
	Global carbon emmissions have been curbed	1.66667	Desertification	1.88679
	Improvement of existing infrastructure	1.66667	Economic growth plans disregard ecosystem health	1.88679
	All development adheres to environmental and impact assessments	0.833333	Human wildlife conflict continues	1.88679
	Deforestation stops	0.833333	Lack of socio-economic services	1.88679
	Devolution of political power so that more citizens are engaged in matters of governance rather than a few political elites	0.833333	Water scarcity is high	1.88679
	Donors are investing in tree planting and conserving water and natural resources	0.833333	Mining in protected areas	1.88679
	Forecasting strategies are in place fornatural reources use and management	0.833333	Rising temperatures	1.88679
	Improved social welfare and livelihoods	0.833333	The economy has declined	1.88679
	Natural vegetation is maintained	0.833333	Water catchment areas are compromised	1.88679
	No invasive species	0.833333	SUM	1
	SUM	1
	Desired 2063	Percent of mentions	Undesired 2063	Percent of mentions
	Human population growth is controlled	13.8614	Impacts of climate change are disastrous	20
	Good and stable governance	8.91089	Human population growth rate has continued unchecked	11.1111
	Ecosystem health within and beyond protected areas is high (water and other resources are able to provision everyone including animals, people, and economic development)	7.92079	Landscape degradation	8.88889
	Policies and legal frameworks governing conservation are enforced and abided by	7.92079	Encroachment into protected areas	8.88889
	Green infrastructure is being built and green energy is being used - human development needs and conservation goals are balanced	6.93069	The economy has declined	8.88889
	Sound land use management policies (LUP) have been devised and implemented in consultation with local people, and are flexible to changing demands	6.93069	Wildlife losses; plant and animal species extinctions	6.66667
	Protected areas are well demarcated, policed and intact and wildlife is thriving	5.94059	Economic growth plans disregard ecosystem health	4.44444
	Climate change adaptation strategies have been devised and implemented	4.9505	Serengeti and other protected areas are degazetted	4.44444
	Tourism sector is sustainable and well regulated	4.9505	Bad governance	4.44444
	Education and investments are provided to farmers and livestock keepers to sustainably intensify production	3.9604	Landscape fragmentation	4.44444
	Improved social welfare and livelihoods	3.9604	Global carbon emissions and pollution stemming in industrialized countries continues unabated	2.22222
	Comprehensive education on sustainable land use is provided to all (including family planning and climate change awareness)	2.9703	Overexploitation of natural resources	2.22222
	Highly educated populace	2.9703	Technological developments are leading to an increase in illegal activities in protected areas	2.22222
	Infrastructure and economic development continues	2.9703	Competition and conflict for natural resources	2.22222
	Devolution of political power so that more citizens are engaged in matters of governance rather than a few political elites	1.9802	Food insecurity	2.22222
	Environments are restored and rehabilitated	1.9802	Lack of international investment in conservation	2.22222
	All development adheres to environmental and impact assessments	0.990099	Agricultural/livestock sectors are underdeveloped	2.22222
	Communities are participating in sustainable ecosystem use and conservation	0.990099	Human settlement follows no land use plan	2.22222
	Deforestation stops	0.990099	SUM	1
	Forecasting strategies are in place for land use planning and family planning	0.990099
	Global carbon emmissions have been curbed	0.990099
	Impacts of anthropogenic activity are well understood and plans are in place to deal with them	0.990099
	Increase in water volume in the river mara	0.990099
	Increased investment in ecotourism	0.990099
	NGO and parastatal organizations should invest in sustainable projects that meet the needs of local people	0.990099
	Stakeholders have come together and act in a united way, share resources, compromise and accomplish more	0.990099
	Technological advancements are making life better for all	0.990099
	SUM	1
