# Supplementary material for: Serengeti’s futures: Exploring land use and land cover change scenarios to craft pathways for meeting conservation and development goals
Source: Frontiers journal article supplement (doi:10.3389/fcosc.2022.920143), 2022-09-23
Supplement: Table_2.XLSX [file Table_2.XLSX]

## Sheet: DesirableUndesible_soutWestSer
	Southwestern Serengeti
	Desired 2030	Percent of mentions	Undesired 2030	Percent of mentions
	Protected areas are well demarcated, policed and intact and wildlife is thriving	16.6667	Encroachment into protected areas	11.1111
	Comprehensive education to local communities on sustainable land use is provided to all (including climate change awareness)	10.4167	Impacts of climate change are disastrous	11.1111
	Ecosystem health within and beyond protected areas is high (water and other resources are able to provision everyone including animals, people, and economic development)	10.4167	Land degradation	8.33333
	Sound land use management policies (LUP) have been devised and implemented in consultation with local people, and are flexible to changing demands	10.4167	Poaching and hunting of wildlife	8.33333
	Green infrastructure is being built and green energy is being used - human development needs, agriculture and conservation goals are balanced	8.33333	Bad governance	5.55556
	Human population growth is regulated	8.33333	Human population growth rate has continued unchecked	5.55556
	Infrastructure and economic development continues	6.25	Unsustainable agriculture	5.55556
	Growth in mining activities to promote development of western Serengeti	4.16667	Wildlife losses	5.55556
	Tourism sector is sustainable, more developed, well regulated and beneficial to communities	4.16667	Basic infrastructure and low socioeconomic development	2.77778
	Achievement and assessment of SDGs	2.08333	Blockage of migratory corridors and wildlife dispersal zones by human encroachment	2.77778
	Archaeological information provide meaningful insights to long-term social-ecological processes	2.08333	Culture disappearance amongst communities in western serengeti	2.77778
	Climate change adaptation strategies have been devised and implemented	2.08333	Deforestation	2.77778
	Improved and efficient technology of agriculture production	2.08333	Desertification	2.77778
	Improved social welfare and livelihoods	2.08333	Human wildlife conflict continues	2.77778
	Increased tree cover	2.08333	Informal settlements	2.77778
	Policies and legal frameworks governing conservation are enforced and abided by	2.08333	Lack of colloboration between local and national government, international and local stakeholders in addressing environmental challenges	2.77778
	Poverty alleviation strategies are put in place and social services have been improved in consultation with many diverse stakeholders	2.08333	Natural resources not benefitting all community members	2.77778
	Quality research and education on proper land use planning, modern agriculture and livestock keeping	2.08333	Overstocking and livestock encroachment to protected areas	2.77778
	Restoration of degraded areas and invasive species removed	2.08333	Poverty	2.77778
	SUM	1	Researchers and NGOs have not created environmental awreness to communities	2.77778
			Tourism expansion at the expense of wildlife	2.77778
			Water catchment areas are compromised	2.77778
			SUM	1
	Desired 2063	Percent of mentions	Undesired 2063	Percent of mentions
	Protected areas are well demarcated, policed and connected, wildlife is thriving and there is no human-wildlife conflict	20.4545	Land degradation	17.6471
	Sound land use management policies (LUP) have been devised and implemented in consultation with local people, and are flexible to changing demands	9.09091	Impacts of climate change are disastrous	11.7647
	Ecosystem health within and beyond protected areas is high (water and other resources are able to provision everyone including animals, people, and economic development)	6.81818	Poverty	11.7647
	Human population growth is regulated	6.81818	Desertification	8.82353
	Improved social welfare and livelihoods	6.81818	Encroachment in protected areas	5.88235
	Improved, efficient and sustainable technology for agriculture production	6.81818	Low level of formal education	5.88235
	Infrastructure and economic development continues	6.81818	Unplanned land uses	5.88235
	Communities are participating in sustainable ecosystem use and conservation	4.54545	Wildlife hunting and wildlife loss	5.88235
	Global carbon emmissions have been curbed	4.54545	Bad governance	2.94118
	Increase in natural vegetation cover	4.54545	Biodiversity loss	2.94118
	Tourism sector is sustainable, more developed, well regulated and beneficial to communities	4.54545	Blockage of migratory corridors and wildlife dispersal zones by human encroachment	2.94118
	Climate change adaptation strategies have been devised and implemented	2.27273	Degazettement of protected areas	2.94118
	Green infrastructure is being built and green energy is being used - human development needs and conservation goals are balanced	2.27273	Economic growth plans disregard ecosystem health	2.94118
	Highly educated populace	2.27273	Exploitation of natural resources	2.94118
	Improved and efficient technology for agriculture and livestock production	2.27273	Human population growth rate has continued unchecked	2.94118
	Local and foreign investors attracted to invest and develop western Serengeti	2.27273	Natural resources not benefitting all community members	2.94118
	Reforestation and environental restoration is underway	2.27273	Unsustainable use of natural resources	2.94118
	Sound and stringent legislation to curb poaching	2.27273	SUM	1
	Technological advancements are making life better for all	2.27273
	SUM	1
